# Supplementary material for: Filling the holes in piezopolymers with a solid electrolyte: a new paradigm of poling-free dynamic electrets for energy harvesting
Source: Royal Society of Chemistry journal article supplement (doi:10.1039/c6ta07297f), 2016-11-17
Supplement: c6ta07297f1.pdf [file c6ta07297f1.pdf]

## Supporting Information

### Filling the holes in piezopolymer with solid electrolyte: a new paradigm of poling-free dynamic electret for energy harvesting

Chenwen Xu<sup>a, †</sup>, Lei Zhang<sup>a, †</sup>, Yali Xu<sup>a</sup>, Zhenzhong Yin<sup>a</sup>, Qin Chen<sup>a</sup>, Songyuan Ma<sup>a</sup>, Huanhuan Zhang<sup>a</sup>, Rui Huang<sup>b</sup>, Chaoliang Zhang<sup>c</sup>, Long Jin<sup>a</sup>, Weiqing Yang<sup>a, \*</sup>, Jun Lu<sup>a, #, \*</sup>

<sup>a</sup> Key Laboratory of Advanced Technologies of Materials, Ministry of Education, School of Materials Science and Engineering, Southwest Jiaotong University, Chengdu 610031, Sichuan, China

<sup>b</sup> College of Polymer Materials Science and Engineering, Sichuan University, Chengdu 610065, Sichuan, China

<sup>c</sup> State Key Laboratory of Oral Diseases, West China Hospital of Stomatology, Sichuan University, Chengdu 610041, China

---

<sup>†</sup> These authors equally contributed to this work.

<sup>#</sup> Other used names Jun Lv and Jun Lyu.

<sup>\*</sup> Corresponding authors. Tel.: +86 28 8760 2714; fax: +86 28 8760 0454.

E-mail addresses: [junluprc@hotmail.com](mailto:junluprc@hotmail.com) (J. Lu), [wqyang@swjtu.edu.cn](mailto:wqyang@swjtu.edu.cn) (W.Q. Yang).

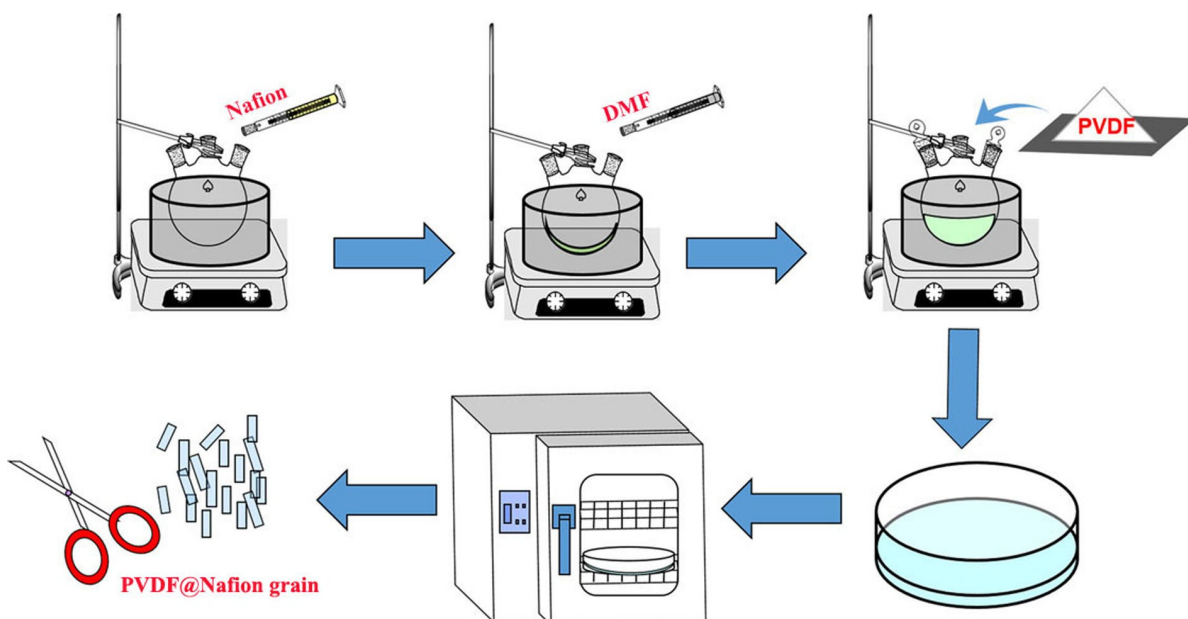

**Fig. S1.** Schematic illustration of the mixing process of PVDF and Nafion.

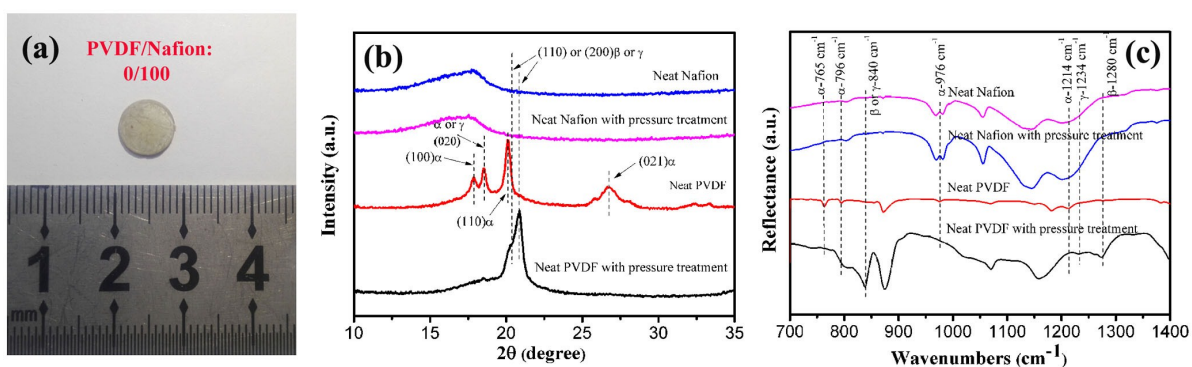

**Fig. S2.** Digital picture of the pressure treated pure Nafion sample (a), and DSC (b) and WAXD (c) results for the original neat Nafion and PVDF, both before and after the applied high pressure treatment, respectively. High pressure experimental conditions: 400 MPa, 260 °C for 10 min.
